# Supplementary material for: Enhanced Jahn–Teller distortion boosts molybdenum trioxide's superior lithium ion storage capability
Source: Royal Society of Chemistry journal article supplement (doi:10.1039/d1dt03580k), 2021-11-23
Supplement: d1dt03580k1.pdf [file d1dt03580k1.pdf]

## Supplementary Information

### **The enhanced Jahn-Teller distortion boosts molybdenum trioxide superior lithium ion storage capability**

Henghan Dai,<sup>a,b</sup> Jinyuan Zhou,<sup>c</sup> Gang Qin,<sup>\*a</sup> and Gengzhi Sun<sup>\*a,b</sup>

<sup>a</sup>*School of Materials Science and Engineering, Henan Polytechnic University, Jiaozuo 454003, China*

<sup>b</sup>*Institute of Advanced Materials, Nanjing Tech University, Nanjing 211816, China*

<sup>c</sup>*School of Physical Science and Technology, Lanzhou University, Lanzhou 730000, China*

*\*Corresponding Author*

*E-mail: qingang@hpu.edu.cn (G. Qin); iamgzsun@njtech.edu.cn (G. Z. Sun)*

## Contents

|                                                                                                                                                                                                                                                                                                                |          |
|----------------------------------------------------------------------------------------------------------------------------------------------------------------------------------------------------------------------------------------------------------------------------------------------------------------|----------|
| <b>Figure S1.</b> SEM and TEM images of $\alpha$ -MoO <sub>3</sub> .....                                                                                                                                                                                                                                       | <b>3</b> |
| <b>Figure S2.</b> SEM images of HI-MoO <sub>3</sub> -12h and HI-MoO <sub>3</sub> -24h .....                                                                                                                                                                                                                    | <b>3</b> |
| <b>Figure S3.</b> Optical photographs of $\alpha$ -MoO <sub>3</sub> and HI-MoO <sub>3</sub> .....                                                                                                                                                                                                              | <b>3</b> |
| <b>Figure S4.</b> EDS results of $\alpha$ -MoO <sub>3</sub> and HI-MoO <sub>3</sub> -36h .....                                                                                                                                                                                                                 | <b>4</b> |
| <b>Figure S5.</b> HRTEM images of HI-MoO <sub>3</sub> -12h and HI-MoO <sub>3</sub> -24h .....                                                                                                                                                                                                                  | <b>4</b> |
| <b>Figure S6.</b> <i>I-V</i> curves of $\alpha$ -MoO <sub>3</sub> nanobelts and HI-MoO <sub>3</sub> -36h.....                                                                                                                                                                                                  | <b>4</b> |
| <b>Figure S7.</b> XPS full spectra of $\alpha$ -MoO <sub>3</sub> and HI-MoO <sub>3</sub> -36h .....                                                                                                                                                                                                            | <b>5</b> |
| <b>Figure S8.</b> CV curves of $\alpha$ -MoO <sub>3</sub> , GITT curves, and the capacitive contribution .....                                                                                                                                                                                                 | <b>5</b> |
| <b>Table S1.</b> The equivalent circuit model, the fitted overall resistance of the cell components ( $R_s$ ), and the fitted charge transfer resistance ( $R_{ct}$ ) of MoO <sub>3</sub> //Li and HI-MoO <sub>3</sub> -36h//Li batteries (before and after cycling 100 times at 0.1 A g <sup>-1</sup> ) ..... | <b>6</b> |

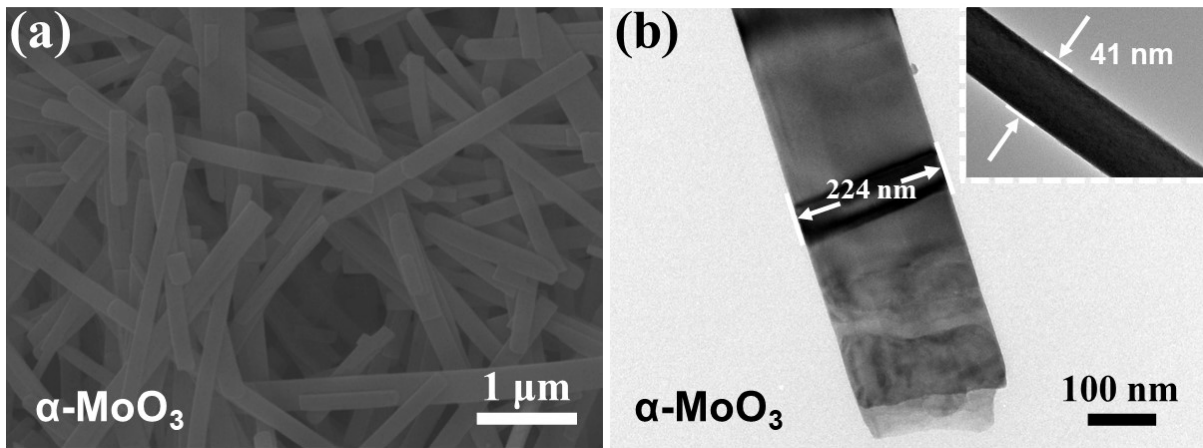

Fig. S1. (a) SEM and (b) TEM images of  $\alpha\text{-MoO}_3$ . Inset: the side view of  $\alpha\text{-MoO}_3$  nanobelt.

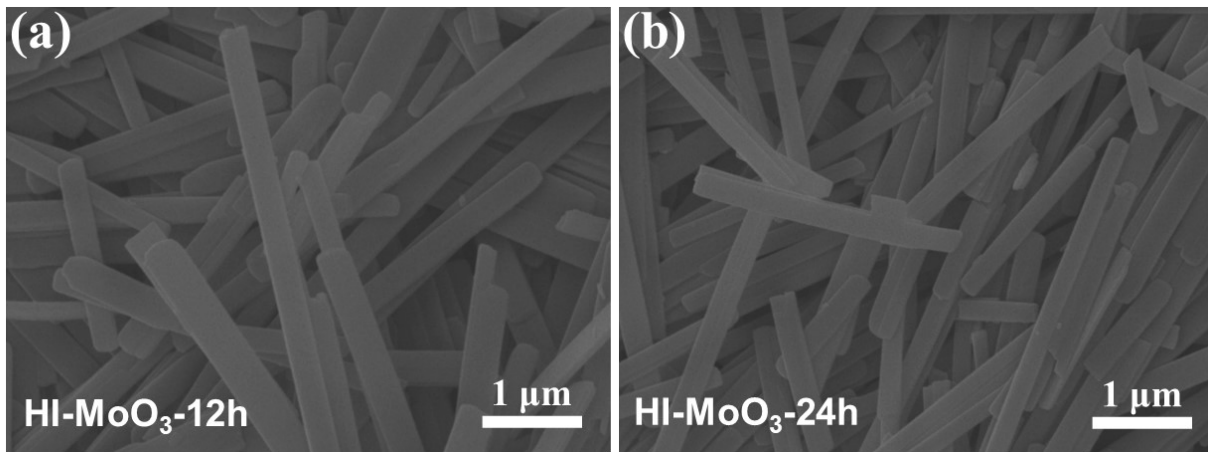

Fig. S2. SEM images of (a)  $\text{HI-MoO}_3\text{-12h}$  and (b)  $\text{HI-MoO}_3\text{-24h}$ .

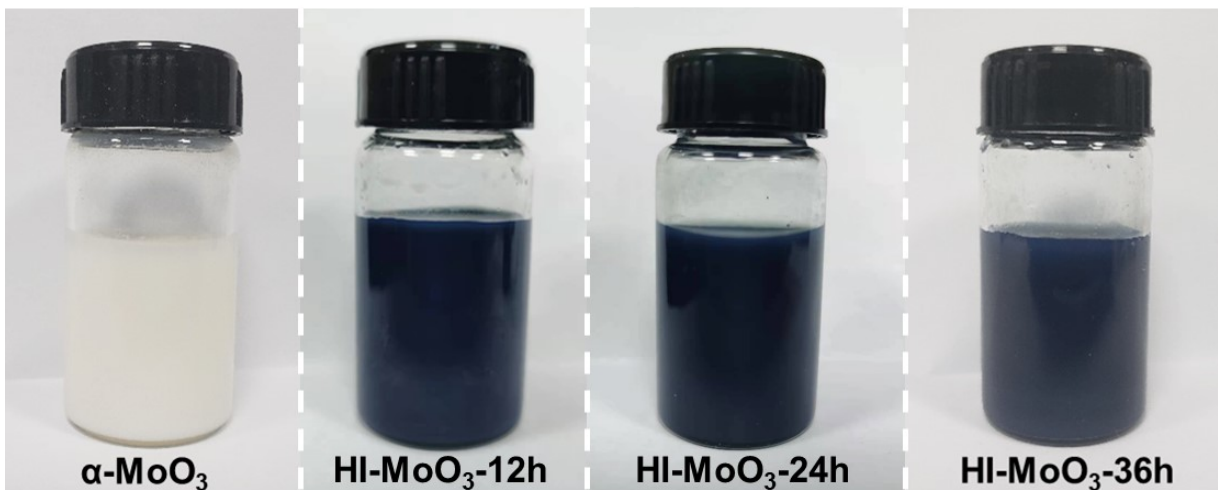

Fig. S3. Optical photographs of  $\alpha\text{-MoO}_3$ ,  $\text{HI-MoO}_3\text{-12h}$ ,  $\text{HI-MoO}_3\text{-24h}$ , and  $\text{HI-MoO}_3\text{-36h}$ .

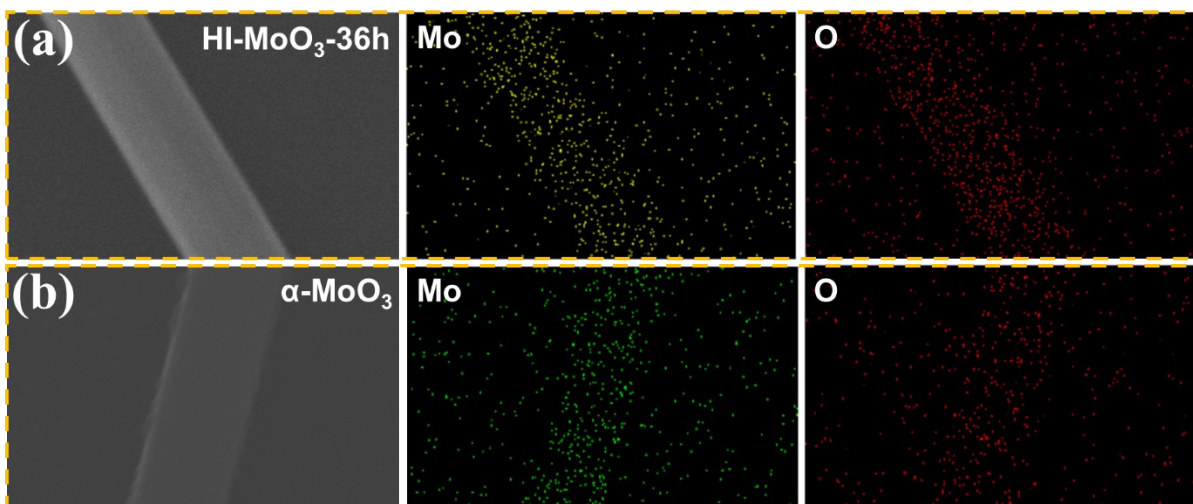

Fig. S4. EDS results of  $\alpha$ - $\text{MoO}_3$  and HI- $\text{MoO}_3$ -36h.

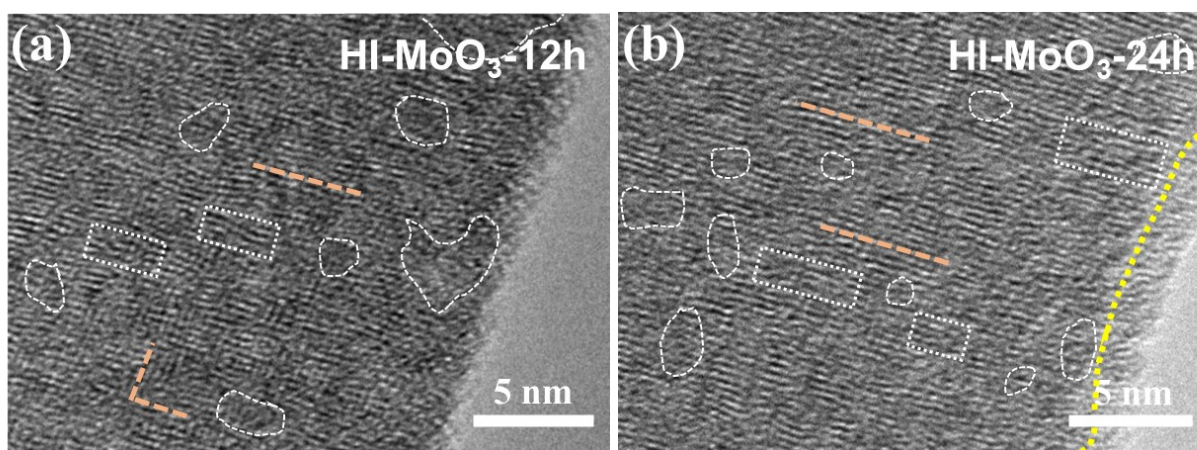

Fig. S5. HRTEM images of (a) HI- $\text{MoO}_3$ -12h and (b) HI- $\text{MoO}_3$ -24h.

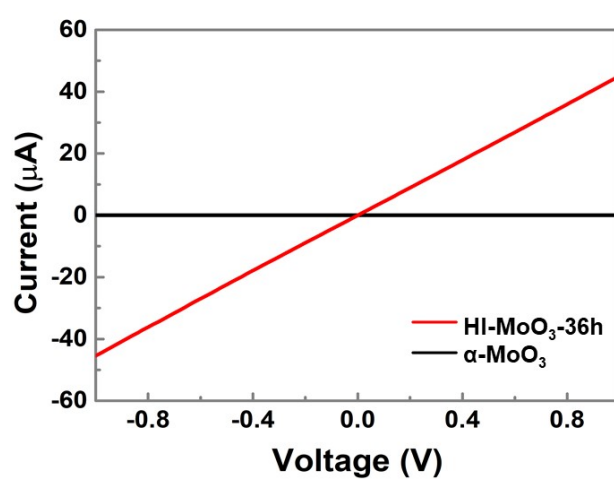

Fig. S6.  $I$ - $V$  curves of  $\alpha$ - $\text{MoO}_3$  nanobelts and HI- $\text{MoO}_3$ -36h.

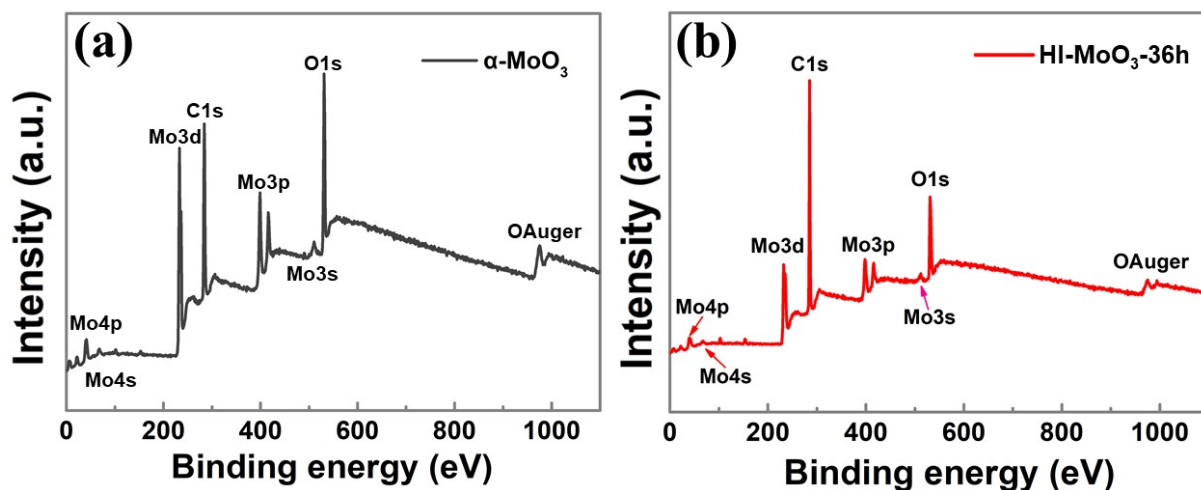

Fig. S7. XPS full spectra of  $\alpha$ - $\text{MoO}_3$  and HI- $\text{MoO}_3$ -36h.

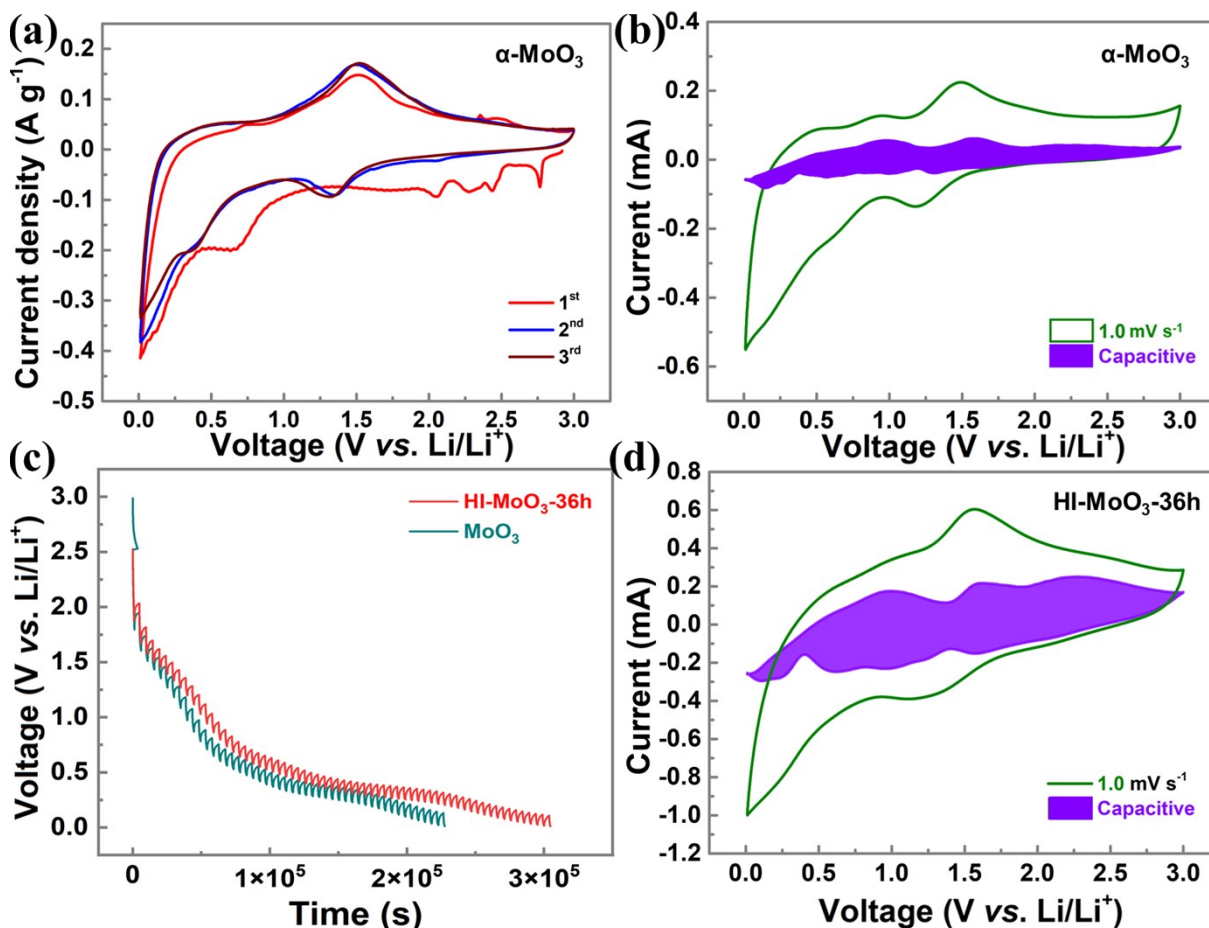

Fig. S8. (a) CV curves of first three cycles of  $\alpha$ - $\text{MoO}_3$ . (b) The capacitive contribution in  $\alpha$ - $\text{MoO}_3$  at  $1.0 \text{ mV s}^{-1}$ . (c) The GITT discharge curves of  $\alpha$ - $\text{MoO}_3$  and HI- $\text{MoO}_3$ -36h. (d) The contribution to capacitive charge storage in HI- $\text{MoO}_3$ -36h at  $1.0 \text{ mV s}^{-1}$ .

| 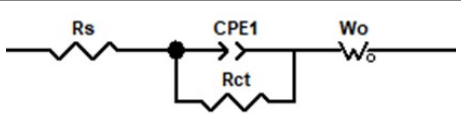 | $R_s$ (before cycling) | $R_{ct}$ (before cycling) | $R_s$ (after cycling) | $R_{ct}$ (after cycling) |
|-----------------------------------------------------------------------------------|------------------------|---------------------------|-----------------------|--------------------------|
| MoO <sub>3</sub>                                                                  | 19.9 $\Omega$          | 850.0 $\Omega$            | 10.6 $\Omega$         | 95.6 $\Omega$            |
| HI-MoO <sub>3</sub> -36h                                                          | 8.2 $\Omega$           | 241.0 $\Omega$            | 5.3 $\Omega$          | 72.9 $\Omega$            |

**Table S1.** The equivalent circuit model, the fitted overall resistance of the cell components ( $R_s$ ) and the fitted charge transfer resistance ( $R_{ct}$ ) of MoO<sub>3</sub>//Li and HI-MoO<sub>3</sub>-36h//Li batteries (before and after cycling 100 times at 0.1 A g<sup>-1</sup>).
